# Supplementary material for: Synthesis of dual type Fe species supported mesostructured silica nanoparticles: synergistical effects in photocatalytic activity
Source: Royal Society of Chemistry journal article supplement (doi:10.1039/c4ra13837f), 2015-01-01
Supplement: c4ra13837f1.pdf [file c4ra13837f1.pdf]

### Supporting Information

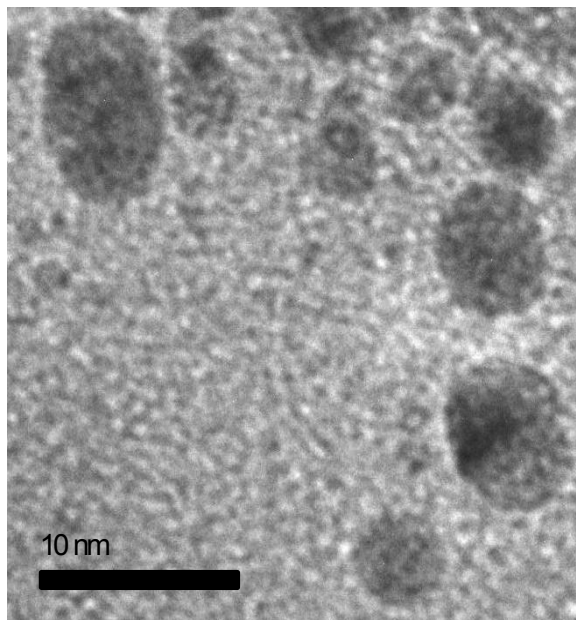

*Figure S1.* TEM image of original IS-FeOOH particles

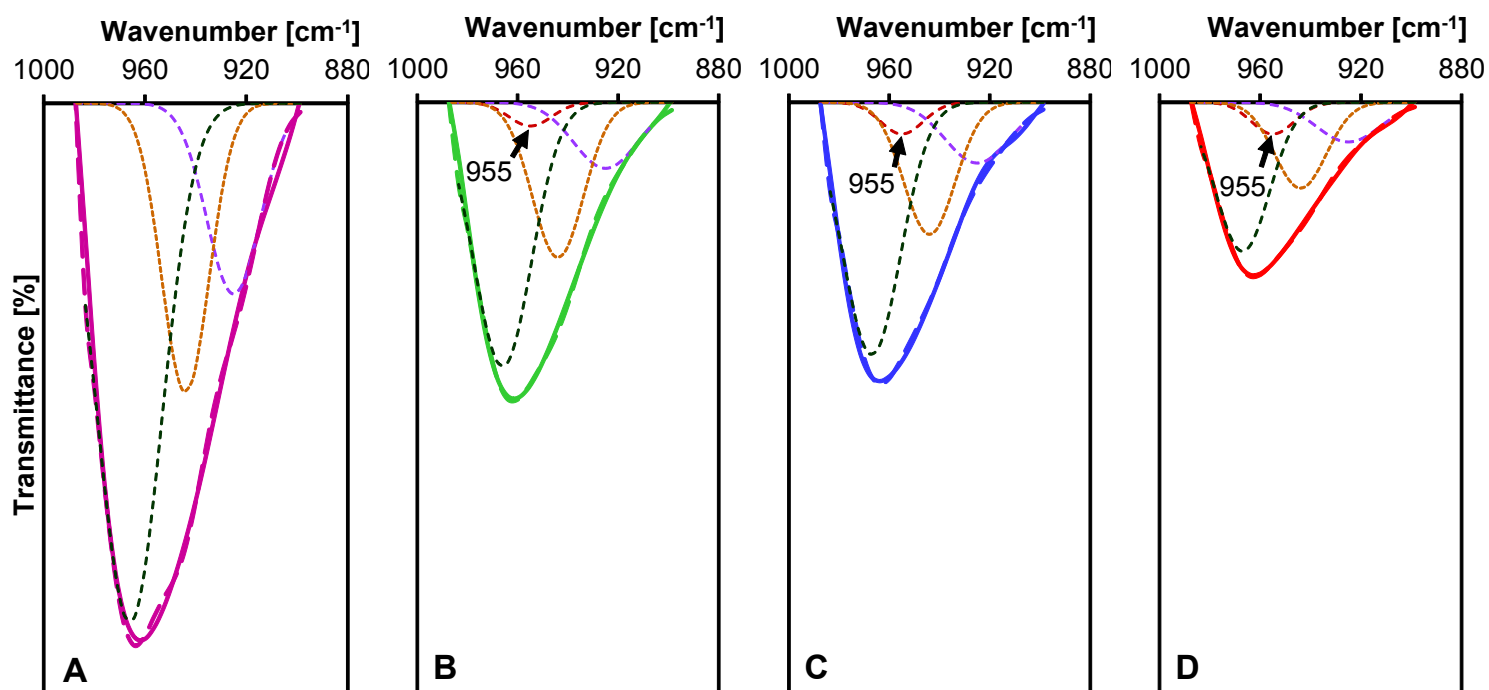

Figure S2. FT-IR spectra of (A) MSN, (B) 5wt% IS-FeOOH/MSN, (C) 10wt% IS-FeOOH/MSN and (D) 15wt% IS-FeOOH/MSN and Gaussian curve-fitting of band at 960 cm<sup>-1</sup>
